# Supplementary material for: RGD-Functionalized Hydrogel Supports the Chondrogenic Commitment of Adipose Mesenchymal Stromal Cells
Source: MDPI journal article supplement (doi:10.3390/gels8060382), 2022-06-15
Supplement: s1 [file s1]

**Figure S1: hASCs characterization**

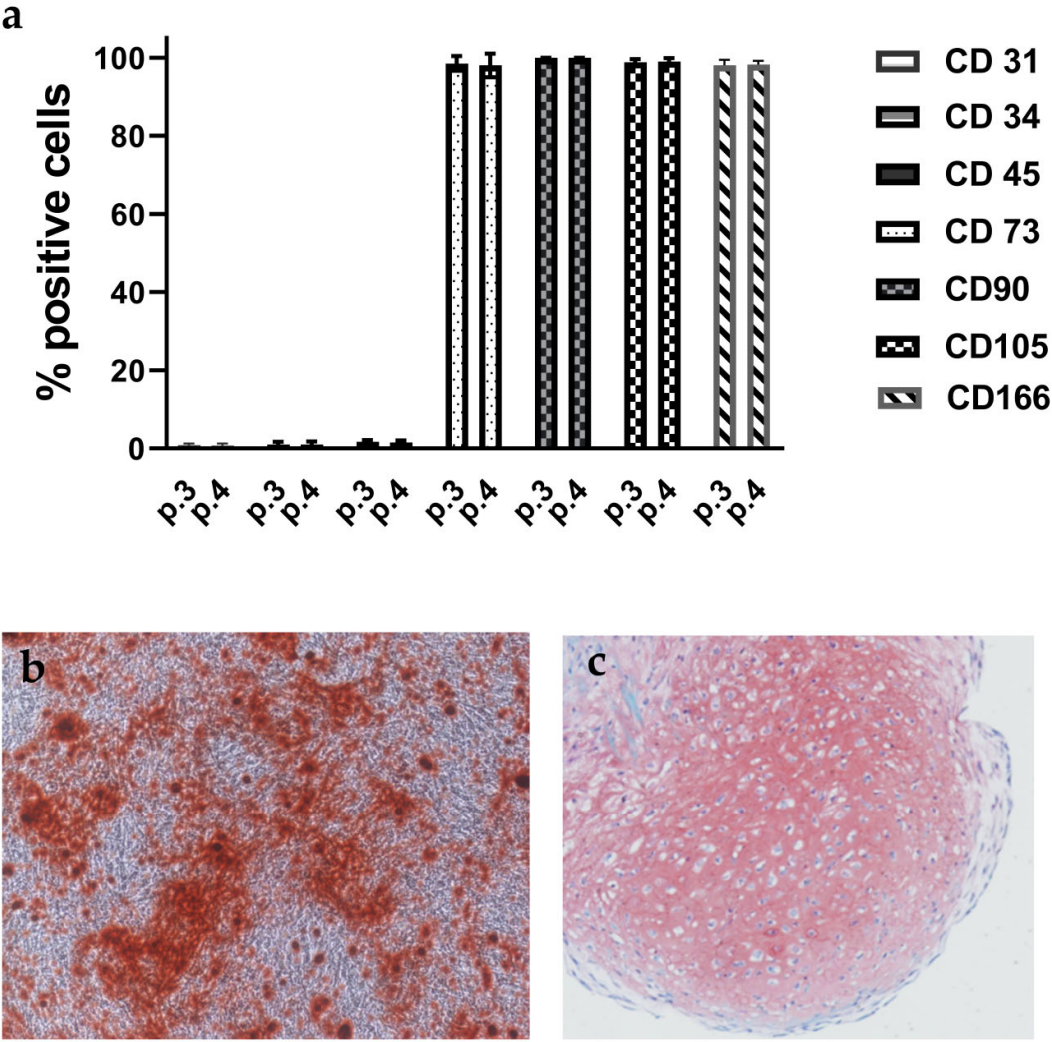

a) Antigenic Characterization of hASCs at both passage 3 (p.3) and passage 4 (p.4), data are expressed as % of positive cells (mean  $\pm$ SD). b) Alizarin Red staining on hASC osteogenic differentiated at day 21. c) Safranin O staining on hASC chondrogenic differentiated at day 28.

**Table S1:** Oligonucleotide primers used for real-time PCR.

| Target Gene   | Primers (forward and reverse)                  | Product size (bp) | GenBank Accession No.                      | Primer Efficiency (%) |
|---------------|------------------------------------------------|-------------------|--------------------------------------------|-----------------------|
| <i>ACAN</i>   | TCGAGGACAGCGAGGCC<br>TCGAGGGTGTAGCGTGTAGAGA    | 85                | NM_001135                                  | 96,5                  |
| <i>COL1A1</i> | CCTGGATGCCATCAAAGTCT<br>CGCCATACTCGAACTGGAAT   | 170               | NM_000088                                  | 95,4                  |
| <i>COL2A1</i> | GACAATCTGGCTCCCAAC<br>ACAGTCTTGCCCCACTTAC      | 228               | NM_001844                                  | 98,1                  |
| <i>COMP</i>   | Biorad unique assay ID:<br>qHsaCID0021064      | 148               | NC_000019.9<br>NG_007070.1<br>NT_011295.11 | 95                    |
| <i>GAG</i>    | Biorad unique assay ID:<br>qHsaCID0005989CSPG4 | 148               | NC_000015.9<br>NT_010194.17                | 101                   |
| <i>GAPDH</i>  | CGGAGTCAACGGATTTGG<br>CCTGGAAGATGGTGATGG       | 218               | NM_002046                                  | 101,9                 |
| <i>MKI67</i>  | TCTGGTAATGCACACTCCACC<br>GCTTTGTGCCTTCACTTCCAC | 112               | NM_002417                                  | 98,1                  |
| <i>SOX9</i>   | GAGCAGACGCACATCTC<br>CCTGGGATTGCCCCGA          | 281               | NM_000346                                  | 97,2                  |
